# Supplementary material for: Impact of diabetes on remodelling, microvascular function and exercise capacity in aortic stenosis
Source: Open Heart. 2023 Aug 16;10(2):e002441. doi: 10.1136/openhrt-2023-002441 (PMC10432628; doi:10.1136/openhrt-2023-002441)
Supplement: Supplementary data [file openhrt-2023-002441supp001.pdf]

Supplementary Material

Contents

Supplementary Table 1: List of biomarkers assessed ..... 2

Supplementary Method: Image analysis ..... 3

Supplementary Method: Plasma Biomarkers..... 3

Supplementary Figure 1: Number of participants with each investigation performed across the cohort. .... 4

Supplementary Table 2: Sensitivity analysis comparing aortic stenosis participants with and without diabetes, with the exclusion of participants with pre-diabetes..... 5

Supplementary Table 3: Levels of plasma biomarkers in the two groups. .... 6

Supplementary Table 4: Proportion of each group with high levels of plasma biomarkers ..... 7

Supplementary Table 5: Cox regression models for the primary composite endpoint ..... 8

**Supplementary Table 1: List of biomarkers assessed**

|                                   |                                               |
|-----------------------------------|-----------------------------------------------|
| Adiponectin                       | Matrix metalloproteinase-9                    |
| Angiopoietin-2                    | Matrix metalloproteinase-12                   |
| Chitinase-3-Like-1                | Myeloperoxidase                               |
| C-reactive protein                | NTproANP                                      |
| Cystatin-C                        | Osteoprotegerin                               |
| Endoglin                          | Osteopontin                                   |
| Endostatin                        | Pentraxin-3                                   |
| Endothelin-1                      | P-Selectin                                    |
| Fatty acid binding protein-3      | proBNP                                        |
| Fatty acid binding protein-4      | Renin                                         |
| Fas                               | Serpin-E1                                     |
| Fibroblast growth factor-21       | Suppression of tumorigenicity-2               |
| Fibroblast growth factor-23       | Syndecan-1                                    |
| Galectin-3                        | Syndecan-4                                    |
| Growth differentiation factor-15  | Tenascin C                                    |
| Intercellular adhesion molecule-1 | T-cell immunoglobulin and mucin domain 1      |
| Interleukin-1 beta                | Tissue inhibitor of metalloproteinases-1      |
| Interleukin-6                     | Tissue inhibitor of metalloproteinases-4      |
| Interleukin-8                     | Tumour necrosis factor-alpha                  |
| Interleukin-10                    | Tumour necrosis factor-receptor 1             |
| Lipocalin-2 (NGAL)                | Tumour necrosis factor-receptor 2             |
| Matrix metalloproteinase-2        | Troponin T                                    |
| Matrix metalloproteinase-3        | Vascular endothelial growth factor            |
| Matrix metalloproteinase-7        | Vascular endothelial growth factor-receptor 1 |
| Matrix metalloproteinase-8        |                                               |

## Supplementary Method: Image analysis

LV volumes and mass were quantified using the built-in automated contouring tool using the short-axis stack with adjustments only made for clear and obvious errors. Biplane left atrial volumes were calculated using the 4- and 2-chamber cine images using the automated tool to contour throughout the cardiac cycle.

Tissue tracking was used to assess myocardial strain as previously described[1] to calculate global longitudinal strain (GLS) and global circumferential strain (GCS) as well as longitudinal and circumferential peak early diastolic strain rate (PEDSR). Systolic strain values are presented as absolute values such that lower values indicate worse myocardial mechanics[2]. Extracellular volume fraction (ECV) was calculated using pre- and post-contrast T1 maps and the haematocrit sampled on the same day as the CMR scan[3].

Perfusion images were first assessed qualitatively for regional perfusion defects by two experienced observers. Quantitative perfusion was assessed using a model independent deconvolution technique[4], or a dual-sequence gradient echo method with inline automated reconstruction and post-processing[5]. Myocardial perfusion reserve (MPR) was calculated as a ratio of global stress to rest myocardial blood flow. To minimise the impact of epicardial disease on assessment of coronary microvascular function, participants with infarction, regional perfusion defects or known obstructive coronary artery disease were excluded from quantitative perfusion analysis.

LGE images were qualitatively assessed by two experienced observers for focal fibrosis which was categorised as present or absent. Where present it was further categorised as infarction or non-ischemic. Right ventricular insertion point fibrosis was not classed as pathological.

## Supplementary Method: Plasma Biomarkers

Plasma biomarkers for which >80% of participants had values below the lower limit of detection were excluded from analysis. Plasma biomarkers where 10-80% of values were at the lower limit of detection were dichotomised by first removing the values at the lower limit of detection. The Log10 mean was then used as the threshold for the remaining values. Values below the lower limit of detection or below the Log10 mean were classed as “Low”, whilst those above the Log10 mean were classed as “High”. Biomarkers where <10% met the lower limit of detection were treated as continuous variables with data Log10 transformed prior to group comparison.

Supplementary Figure 1: Number of participants with each investigation performed across the cohort.

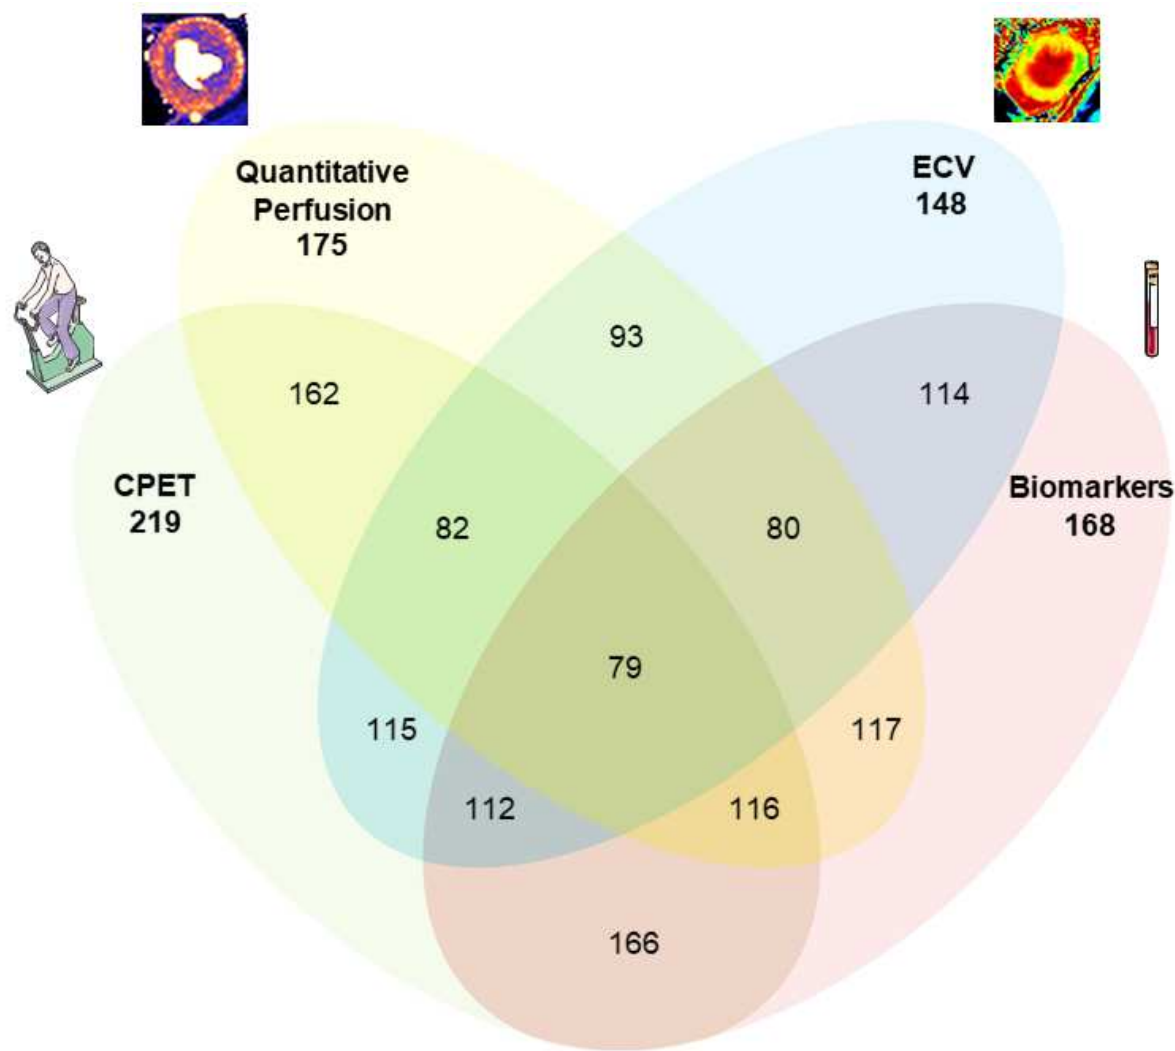

**Supplementary Table 2: Sensitivity analysis comparing aortic stenosis participants with and without diabetes, with the exclusion of participants with pre-diabetes.**

|                                                     | <b>Diabetes<br/>(n= 56)</b> | <b>Non-diabetes<br/>(n=171)</b> | <b>P value</b>     |
|-----------------------------------------------------|-----------------------------|---------------------------------|--------------------|
| <b>Age (years)</b>                                  | 70 (63 - 75)                | 68 (60-75)                      | 0.296              |
| <b>Sex, n (%) male</b>                              | 44 (79)                     | 130 (76)                        | 0.696 <sup>†</sup> |
| <b>Body mass index (kg/m<sup>2</sup>)</b>           | 30.1 ± 5.2                  | 28.1 ± 4.2                      | 0.005              |
| <b>HbA1c (%)</b>                                    | 6.8 ± 1.0                   | 5.5 ± 0.3                       | <0.001             |
| <b>Imaging*</b>                                     |                             |                                 |                    |
| <b>LV EDVi (mL/m)</b>                               | 88 ± 25                     | 91 ± 21                         | 0.238              |
| <b>LV EF (%)</b>                                    | 68 ± 11                     | 70 ± 7                          | 0.122              |
| <b>LVMi (g/m)</b>                                   | 97 ± 22                     | 95 ± 24                         | 0.613              |
| <b>LVM/EDV (g/mL)</b>                               | 1.14 ± 0.24                 | 1.07 ± 0.22                     | 0.177              |
| <b>LV GCS (%)</b>                                   | 17.0 ± 3.4                  | 18.2 ± 3.1                      | 0.069              |
| <b>LV GLS (%)</b>                                   | 14.0 ± 3.5                  | 14.6 ± 2.8                      | 0.569              |
| <b>Presence of LGE, n (%)</b>                       | 32 (59)                     | 91 (54)                         | 0.461 <sup>†</sup> |
| <b>Native T1 (ms)</b>                               | 1172 ± 83                   | 1149 ± 73                       | 0.983              |
| <b>Extracellular volume (%)</b>                     | 25.9 ± 3.1                  | 24.9 ± 2.3                      | 0.075              |
| <b>Myocardial perfusion reserve</b>                 | 2.02 ± 0.75                 | 2.34 ± 0.68                     | 0.048              |
| <b>CPET<sup>‡</sup></b>                             |                             |                                 |                    |
| <b>Peak VO<sub>2</sub> (mL/kg/min)</b>              | 14.7 ± 4.9                  | 17.5 ± 5.4                      | 0.006              |
| <b>Percentage predicted peak VO<sub>2</sub> (%)</b> | 68 ± 21                     | 76 ± 16                         | 0.006              |
| <b>Peak respiratory exchange ratio</b>              | 1.12 ± 0.16                 | 1.10 ± 0.13                     | 0.327              |

Ventricular volumes and mass were indexed to height. Predicted peak VO<sub>2</sub> calculated using the Wasserman/Hansen

equation. Values presented as mean ± standard deviation, median (interquartile range) or n (%) as appropriate.

Abbreviations: LV= left ventricle, EDVi = indexed end-diastolic volume, EF = ejection fraction, LVMi = indexed left

ventricular mass, GCS =global circumferential strain, GLS = global longitudinal strain, LGE = late gadolinium

enhancement. \* = ANCOVA adjusted for age, sex, ethnicity, systolic BP, eGFR, BMI and aortic valve mean pressure

gradient; <sup>†</sup> = chi-squared test; <sup>‡</sup> = ANCOVA adjusted for systolic BP, eGFR and aortic valve mean pressure gradient

**Supplementary Table 3: Levels of plasma biomarkers in the two groups.**

|                                          | Diabetes (n=32) | Non-diabetes (n=136) | Mean difference | 95% CI Mean Difference |       | P value          |
|------------------------------------------|-----------------|----------------------|-----------------|------------------------|-------|------------------|
| Adiponectin                              | 8.14 ± 1.08     | 8.17 ± 1.30          | -0.024          | -0.468                 | 0.420 | 0.913            |
| Angiopoietin-2                           | 3.27 ± 0.63     | 3.13 ± 0.67          | 0.143           | -0.114                 | 0.401 | 0.273            |
| Chitinase-3-Like-1                       | 5.18 ± 0.88     | 5.08 ± 0.68          | 0.098           | -0.181                 | 0.376 | 0.490            |
| Cystatin-C                               | 6.68 ± 0.71     | 6.49 ± 0.72          | 0.197           | -0.081                 | 0.476 | 0.163            |
| Endostatin                               | 5.36 ± 0.50     | 5.19 ± 0.47          | 0.177           | -0.008                 | 0.362 | 0.060            |
| Fatty acid binding protein-4             | 4.15 ± 0.73     | 3.99 ± 0.68          | 0.156           | -0.111                 | 0.423 | 0.251            |
| Galectin-3                               | 4.47 ± 1.03     | 4.38 ± 1.00          | 0.089           | -0.300                 | 0.478 | 0.651            |
| hsTroponin I                             | 0.83 ± 0.33     | 0.82 ± 0.48          | 0.006           | -0.171                 | 0.183 | 0.943            |
| Lipocalin-2                              | 5.58 ± 0.59     | 5.48 ± 0.68          | 0.102           | -0.155                 | 0.358 | 0.435            |
| Matrix metalloproteinase-2               | 6.36 ± 0.83     | 6.14 ± 0.91          | 0.219           | -0.128                 | 0.567 | 0.214            |
| Matrix metalloproteinase-3               | 4.51 ± 0.67     | 4.51 ± 0.76          | 0.004           | -0.284                 | 0.292 | 0.979            |
| Matrix metalloproteinase-7               | 3.00 ± 0.55     | 2.78 ± 0.55          | 0.217           | 0.004                  | 0.431 | <b>0.046</b>     |
| Matrix metalloproteinase-9               | 5.01 ± 0.48     | 4.92 ± 0.85          | 0.097           | -0.210                 | 0.404 | 0.534            |
| Myeloperoxidase                          | 5.78 ± 0.98     | 5.30 ± 1.55          | 0.486           | -0.080                 | 1.052 | 0.092            |
| NTProANP                                 | 4.17 ± 1.14     | 3.97 ± 1.00          | 0.204           | -0.196                 | 0.604 | 0.315            |
| NTproBNP                                 | 1.98 ± 0.64     | 1.73 ± 0.84          | 0.252           | -0.022                 | 0.526 | 0.071            |
| Osteoprotegerin                          | 1.34 ± 0.68     | 1.19 ± 0.77          | 0.155           | -0.139                 | 0.448 | 0.300            |
| Osteopontin                              | 4.14 ± 0.62     | 4.21 ± 0.52          | -0.061          | -0.270                 | 0.148 | 0.563            |
| P-Selectin                               | 4.89 ± 0.96     | 4.91 ± 0.82          | -0.021          | -0.352                 | 0.309 | 0.898            |
| proBNP                                   | 2.53 ± 0.67     | 2.51 ± 0.77          | 0.024           | -0.269                 | 0.317 | 0.870            |
| Renin                                    | 3.27 ± 0.59     | 2.82 ± 0.69          | 0.454           | 0.194                  | 0.714 | <b>&lt;0.001</b> |
| Serpin-E1                                | 5.05 ± 0.37     | 4.96 ± 0.72          | 0.091           | -0.169                 | 0.351 | 0.492            |
| Syndecan-1                               | 2.35 ± 0.64     | 2.26 ± 0.51          | 0.093           | -0.115                 | 0.300 | 0.379            |
| Tenascin-C                               | 4.31 ± 0.88     | 4.36 ± 0.59          | -0.045          | -0.300                 | 0.210 | 0.729            |
| Tissue inhibitor of metalloproteinases-1 | 5.56 ± 0.34     | 5.51 ± 0.38          | 0.051           | -0.092                 | 0.195 | 0.480            |

Values are Log<sub>10</sub> transformed and presented as mean ± standard deviation

**Supplementary Table 4: Proportion of each group with high levels of plasma biomarkers**

|                                               | <b>Diabetes<br/>(n=32)</b> | <b>Non-diabetes<br/>(n=136)</b> | <b>P value</b> |
|-----------------------------------------------|----------------------------|---------------------------------|----------------|
| C reactive protein                            | 22 (69)                    | 98 (72)                         | 0.709          |
| Endoglin                                      | 12 (38)                    | 58 (43)                         | 0.595          |
| Endothelin-1                                  | 6 (19)                     | 33 (24)                         | 0.506          |
| Fatty acid binding protein -3                 | 1 (3)                      | 15 (11)                         | 0.171          |
| Fas                                           | 15 (47)                    | 35 (48)                         | 0.223          |
| Fibroblast growth factor -21                  | 10 (31)                    | 53 (39)                         | 0.417          |
| Fibroblast growth factor -23                  | 9 (28)                     | 26 (19)                         | 0.259          |
| Growth differentiation factor -15             | 19 (59)                    | 50 (37)                         | <b>0.019</b>   |
| Intercellular adhesion molecule -1            | 28 (88)                    | 108 (79)                        | 0.294          |
| Interleukin-10                                | 5 (16)                     | 32 (24)                         | 0.332          |
| Interleukin-6                                 | 8 (25)                     | 37 (27)                         | 0.800          |
| Interleukin-8                                 | 3 (9)                      | 30 (22)                         | 0.104          |
| Matrix metalloproteinase-12                   | 10 (31)                    | 49 (36)                         | 0.610          |
| Matrix metalloproteinase-8                    | 9 (28)                     | 50 (37)                         | 0.357          |
| Pentraxin-C                                   | 10 (31)                    | 49 (36)                         | 0.610          |
| Suppression of tumorigenicity-2               | 20 (63)                    | 76 (56)                         | 0.496          |
| Syndecan-4                                    | 15 (47)                    | 56 (41)                         | 0.557          |
| T-cell immunoglobulin and mucin domain -1     | 3 (9)                      | 14 (10)                         | 0.877          |
| Tissue inhibitor of metalloproteinases -4     | 22 (68)                    | 88 (65)                         | 0.665          |
| Tumour necrosis factor-alpha                  | 8 (25)                     | 32 (24)                         | 0.861          |
| Tumour necrosis factor-receptor 1             | 19 (59)                    | 77 (57)                         | 0.777          |
| Tumour necrosis factor-receptor 2             | 18 (56)                    | 46 (34)                         | <b>0.019</b>   |
| Troponin T                                    | 7 (22)                     | 29 (29)                         | 0.438          |
| Vascular endothelial growth factor-receptor 1 | 9 (28)                     | 41 (30)                         | 0.822          |
| Vascular endothelial growth factor            | 3 (9)                      | 25 (18)                         | 0.219          |

Values represent number (percentage) with high levels

Supplementary Table 5: Cox regression models for the primary composite endpoint

|            | Primary composite endpoint |         |                             |         |                            |         |                              |         |                              |         |
|------------|----------------------------|---------|-----------------------------|---------|----------------------------|---------|------------------------------|---------|------------------------------|---------|
|            | Baseline model<br>(n=204)  |         | Baseline + Renin<br>(n=168) |         | Baseline + MMP7<br>(n=168) |         | Baseline + GDF-15<br>(n=168) |         | Baseline + TNF-R2<br>(n=168) |         |
|            | HR (95% CI)                | P value | HR (95% CI)                 | P value | HR (95% CI)                | P value | HR (95% CI)                  | P value | HR (95% CI)                  | P value |
| Age        | 1.09 (1.05-1.12)           | <0.001  | 1.08 (1.05-1.12)            | <0.001  | 1.08 (1.05-1.12)           | <0.001  | 1.08 (1.04-1.12)             | <0.001  | 1.08 (1.04-1.12)             | <0.001  |
| Diabetes   | 1.34 (0.76-2.37)           | 0.316   | 1.51 (0.77-2.96)            | 0.234   | 1.48 (0.77-2.85)           | 0.240   | 1.44 (0.75-2.78)             | 0.279   | 1.43 (0.73-2.78)             | 0.295   |
| AV mean PG | 0.98 (0.97-1.00)           | 0.089   | 0.99 (0.96-1.01)            | 0.334   | 0.99 (0.96-1.01)           | 0.262   | 0.99 (0.96-1.01)             | 0.361   | 0.99 (0.96-1.01)             | 0.363   |
| AVR        | 2.45 (1.09-5.51)           | 0.031   | 2.16 (0.95-4.96)            | 0.068   | 2.17 (0.95-4.96)           | 0.065   | 2.15 (0.94-4.93)             | 0.072   | 2.16 (0.93-5.03)             | 0.073   |
| Renin      | -                          | -       | 0.87 (0.54-1.41)            | 0.566   | -                          | -       | -                            | -       | -                            | -       |
| MMP-7      | -                          | -       | -                           | -       | 0.79 (0.48-1.28)           | 0.334   | -                            | -       | -                            | -       |
| GDF-15     | -                          | -       | -                           | -       | -                          | -       | 0.97 (0.53-1.77)             | 0.911   | -                            | -       |
| TNF-R2     | -                          | -       | -                           | -       | -                          | -       | -                            | -       | 1.01 (0.55-1.88)             | 0.970   |

Abbreviations: AV = aortic valve, PG = pressure gradient, AVR = aortic valve replacement, MMP-7 = matrix metalloproteinase-7, GDF-15 = growth differentiation factor-15, TNF-R2 = tumour necrosis factor-receptor 2, NA = not applicable

1        Gulsin GS, Henson J, Brady EM, et al. Cardiovascular Determinants of Aerobic Exercise Capacity in Adults With Type 2 Diabetes. *Diabetes Care* 2020;**43**:2248-56.

2        Flachskampf FA, Biering-Sørensen T, Solomon SD, et al. Cardiac Imaging to Evaluate Left Ventricular Diastolic Function. *JACC: Cardiovascular Imaging* 2015;**8**:1071-93.

3        Haaf P, Garg P, Messroghli DR, et al. Cardiac T1 Mapping and Extracellular Volume (ECV) in clinical practice: a comprehensive review. *Journal of Cardiovascular Magnetic Resonance* 2016;**18**:89.

4        Steadman CD, Jerosch-Herold M, Grundy B, et al. Determinants and functional significance of myocardial perfusion reserve in severe aortic stenosis. *JACC Cardiovasc Imaging* 2012;**5**:182-9.

5        Kellman P, Hansen MS, Nielles-Vallespin S, et al. Myocardial perfusion cardiovascular magnetic resonance: optimized dual sequence and reconstruction for quantification. *Journal of Cardiovascular Magnetic Resonance* 2017;**19**:43.
